# Supplementary material for: Diesel exhaust impairs TREM2 to dysregulate neuroinflammation
Source: PubMed Central journal article supplement (PMC7682066; doi:10.1186/s12974-020-02017-7), 2020-11-22

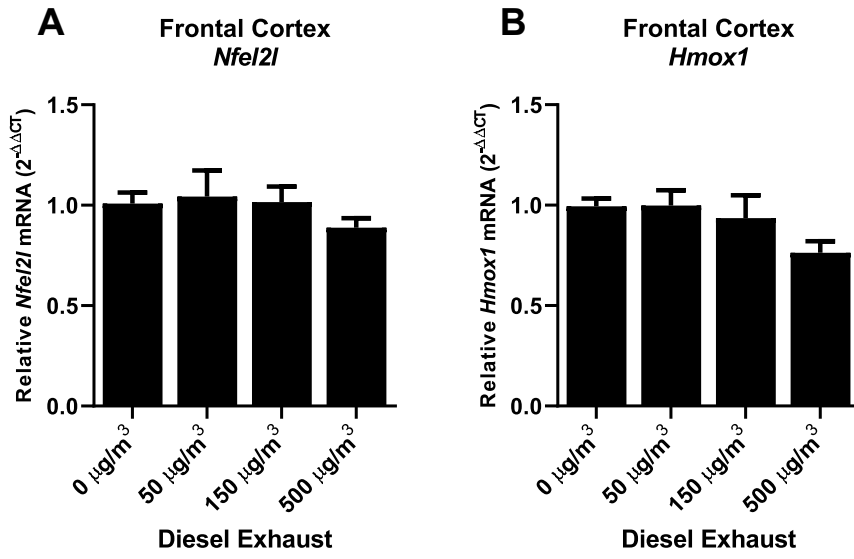

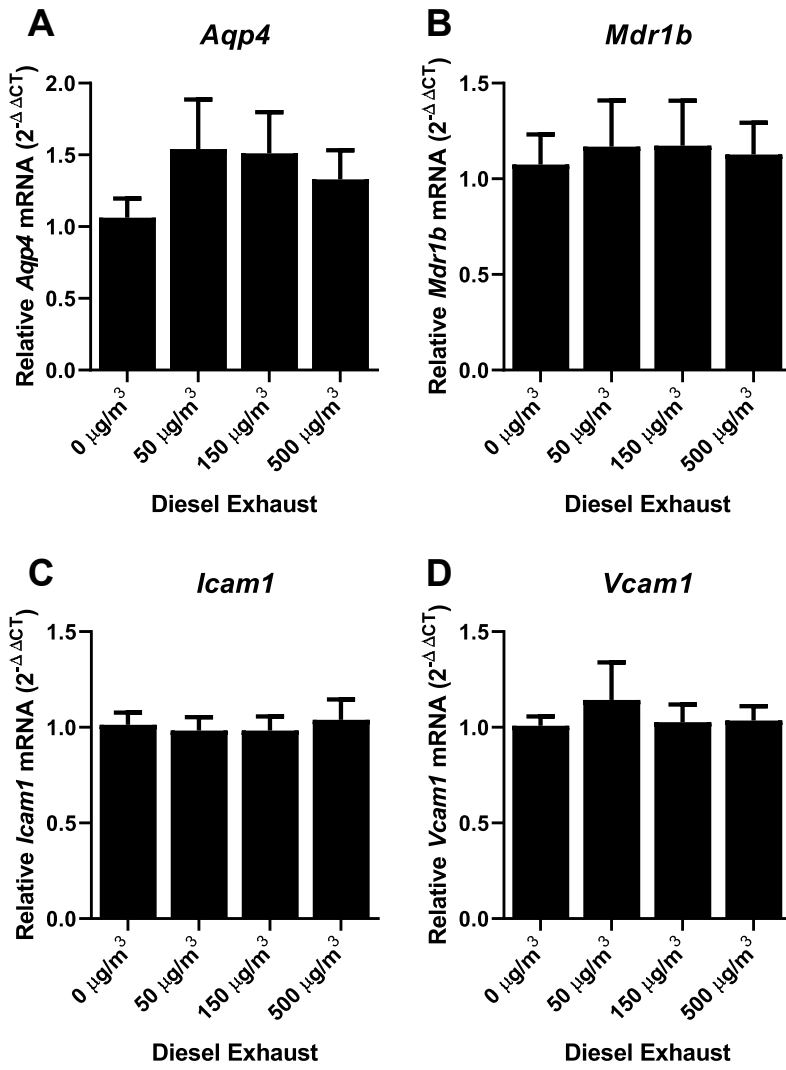

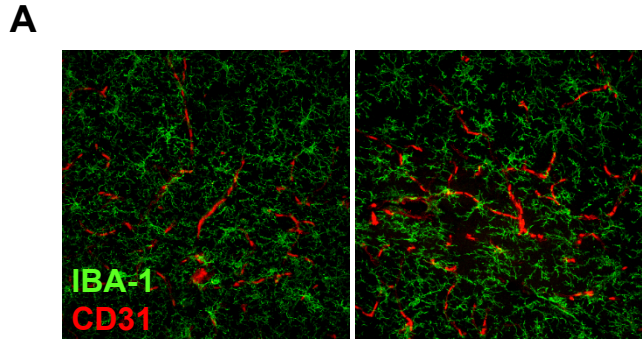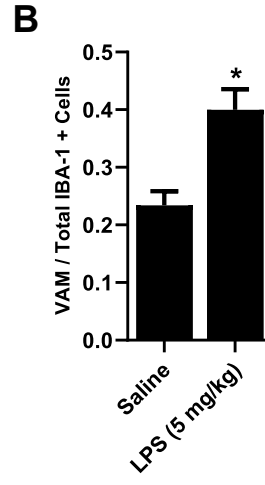

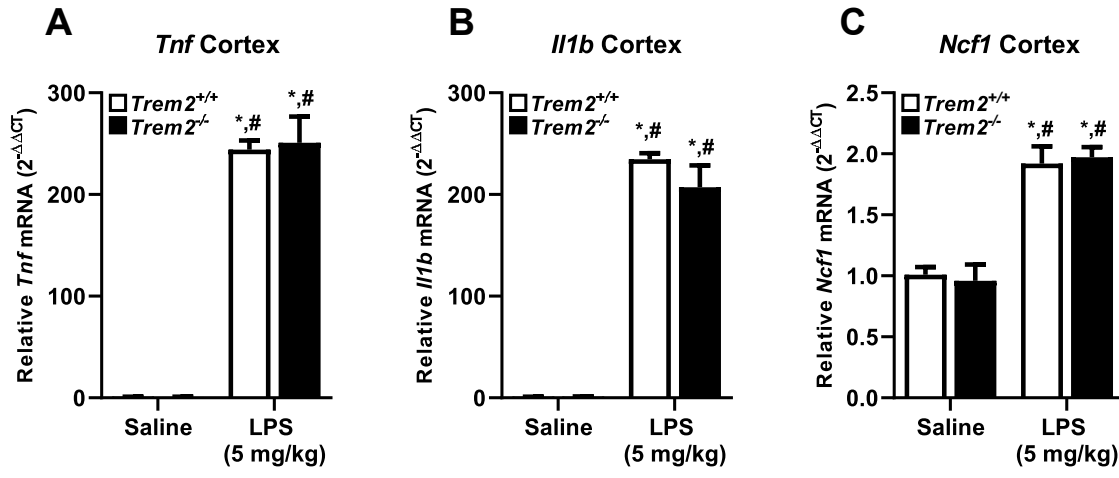

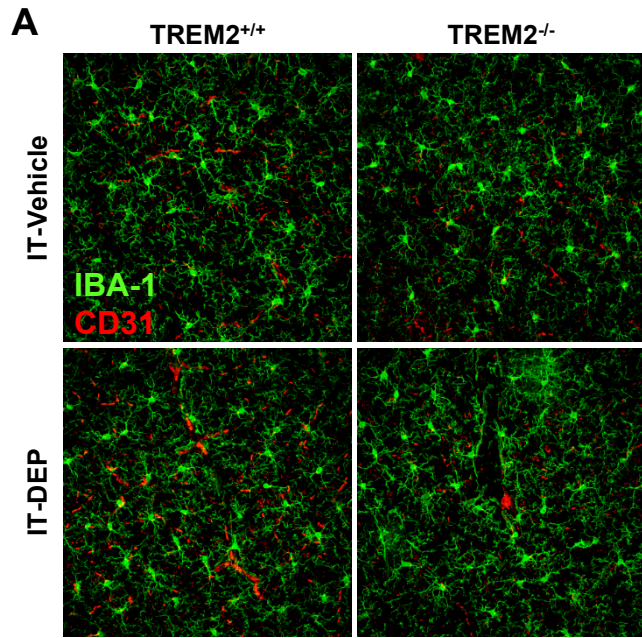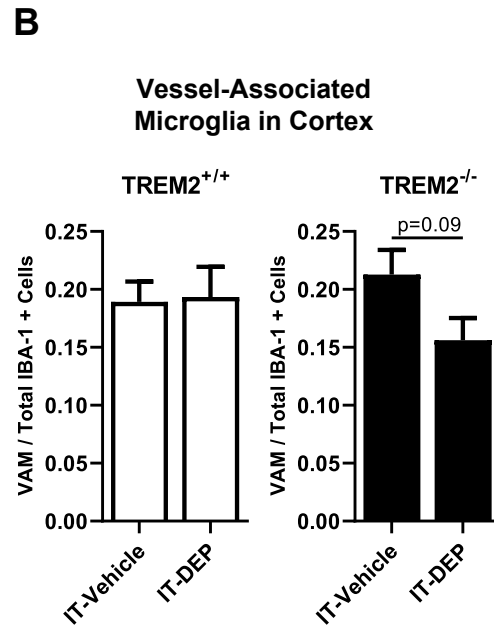

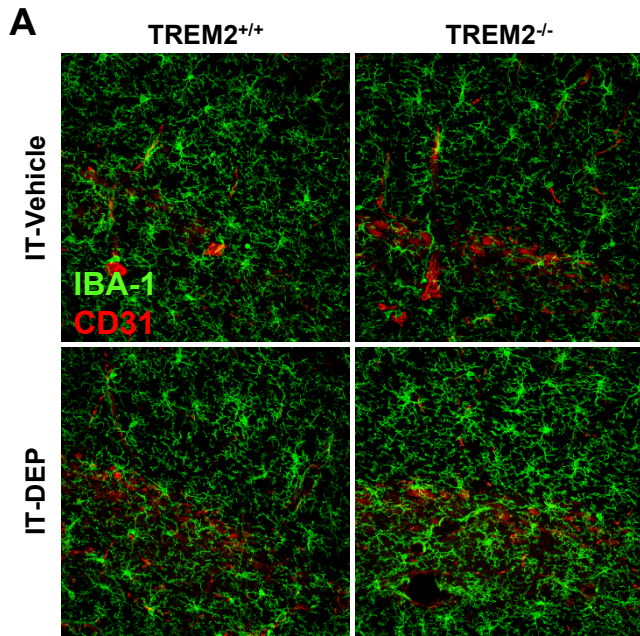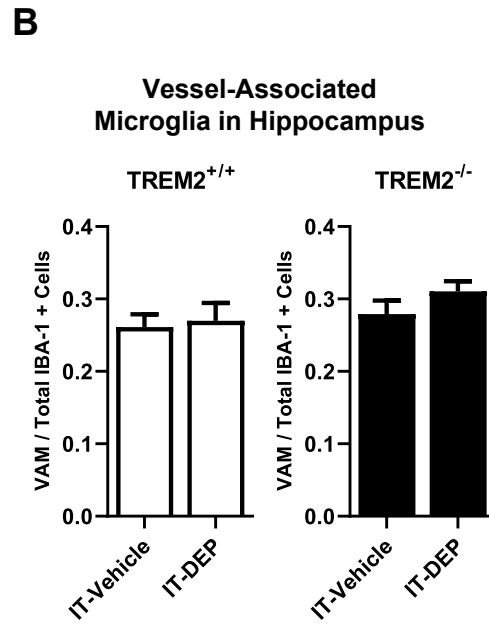

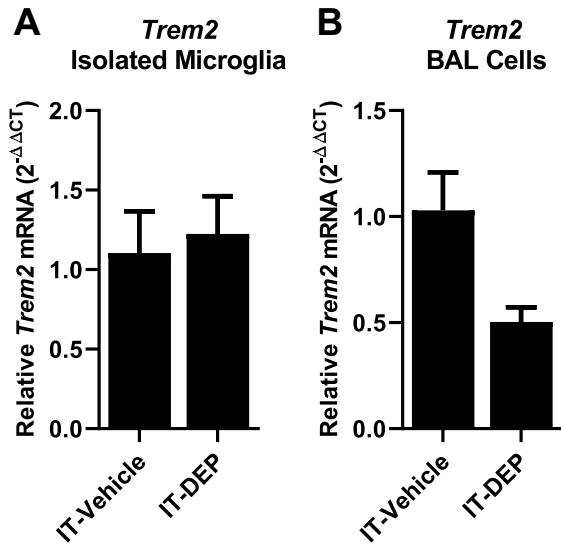

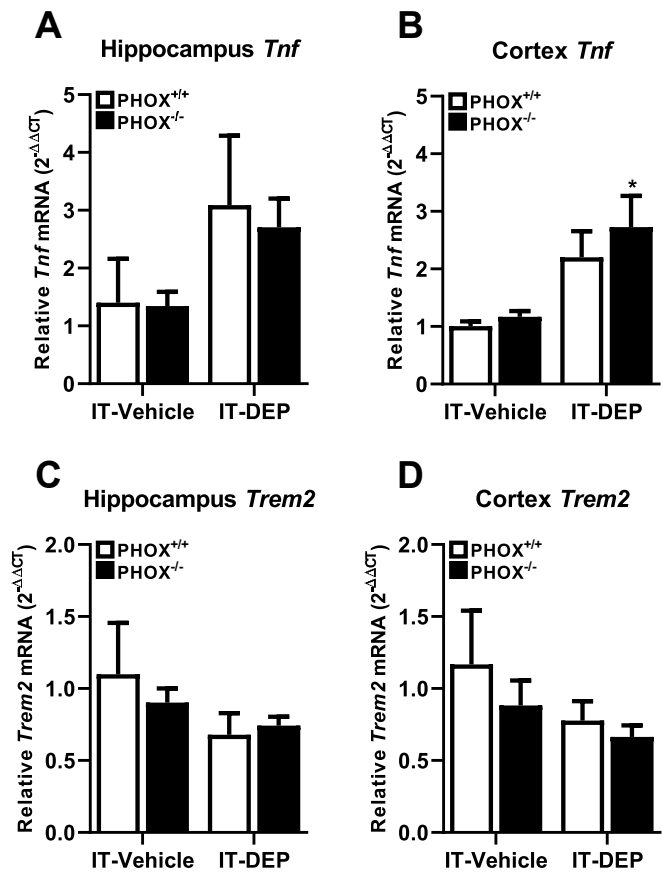

Supplement: 12974_2020_2017_MOESM3_ESM.pdf [file 12974_2020_2017_MOESM3_ESM.pdf]
